# Supplementary material for: Multifunctional Gelatin/Chitosan Electrospun Wound Dressing Dopped with Undaria pinnatifida Phlorotannin-Enriched Extract for Skin Regeneration
Source: MDPI journal article supplement (doi:10.3390/pharmaceutics13122152), 2021-12-14
Supplement: s1 [file s1]

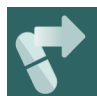

# Supplementary Materials: Multifunctional Gelatin/Chitosan Electrospun Wound Dressing Dopped with *Undaria pinnatifida* Phlorotannin-Enriched Extract for Skin Regeneration

Carolina A. M. Ferreira, Adriana P. Januário, Rafael Félix, Nuno Alves, Marco F. L. Lemos and Juliana R. Dias

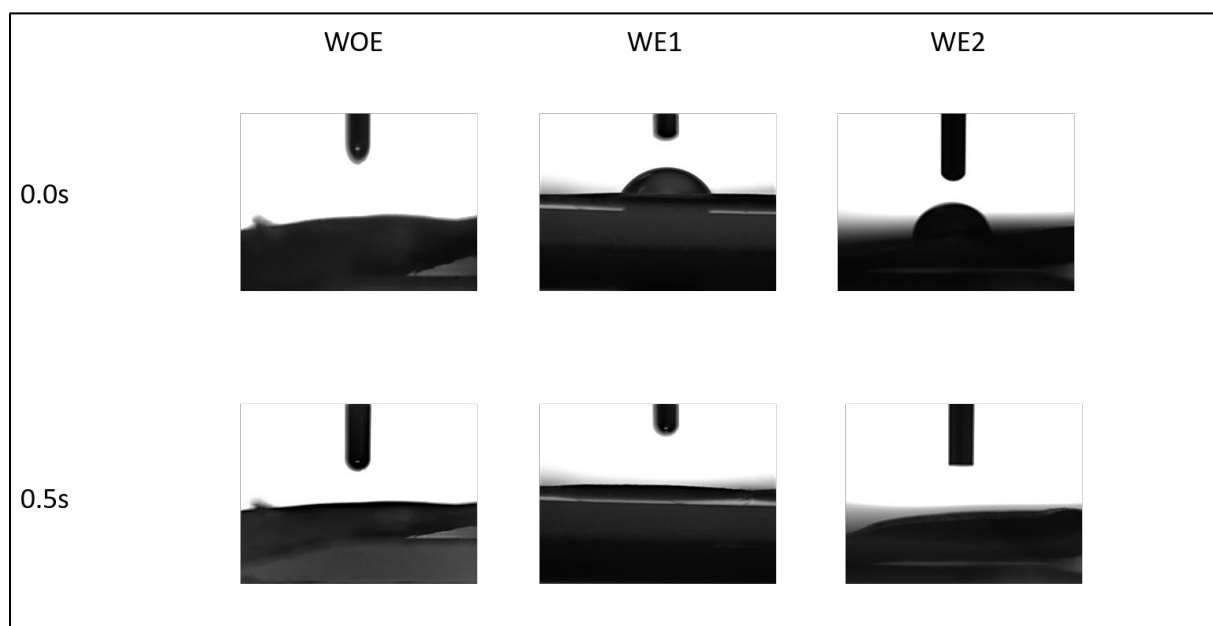

**Figure S1.** Water contact angle vs time profile of the electrospun meshes.
